# Supplementary material for: Transcriptome Analysis Revealed Hormone Pathways and bZIP Genes Responsive to Decapitation in Sunflower
Source: MDPI journal article supplement (doi:10.3390/genes13101737), 2022-09-27
Supplement: s1 [file s1]

Table S1: Protein information of HabZIP TF.

| Sequence ID | Number of Amino Acid | Molecular Weight | Theoretical pI | Instability Index | Aliphatic Index | Grand Average of Hydropathicity |
|-------------|----------------------|------------------|----------------|-------------------|-----------------|---------------------------------|
| HabZIP50    | 273                  | 30059.57         | 5.81           | 32.06             | 61.1            | -0.781                          |
| HabZIP47    | 252                  | 27726            | 6.75           | 39.65             | 61.59           | -0.728                          |
| HabZIP22    | 105                  | 12410.67         | 11.3           | 68.34             | 83.62           | -0.918                          |
| HabZIP40    | 221                  | 24713.95         | 6.87           | 64.41             | 75.38           | -0.739                          |
| HabZIP17    | 229                  | 25210.96         | 9.93           | 60.16             | 56.72           | -0.913                          |
| HabZIP49    | 234                  | 25908.96         | 9.6            | 55.24             | 69.62           | -0.725                          |
| HabZIP14    | 158                  | 17913.5          | 10.75          | 69.48             | 53.23           | -0.97                           |
| HabZIP57    | 142                  | 16402.06         | 9.92           | 68                | 83.73           | -0.637                          |
| HabZIP23    | 273                  | 30181.96         | 6.31           | 30                | 66.45           | -0.662                          |
| HabZIP37    | 256                  | 28882.28         | 9.22           | 52.56             | 58.95           | -1.01                           |
| HabZIP15    | 280                  | 31658.51         | 6.14           | 48.66             | 66.5            | -0.912                          |
| HabZIP12    | 321                  | 35540.78         | 9.24           | 52.8              | 64.98           | -0.925                          |
| HabZIP66    | 298                  | 33175.57         | 9.72           | 51.43             | 70.97           | -0.788                          |
| HabZIP38    | 386                  | 42554.89         | 9.75           | 40.66             | 64.35           | -0.73                           |
| HabZIP28    | 422                  | 45165.57         | 9.69           | 47.11             | 66.52           | -0.582                          |
| HabZIP82    | 384                  | 41681.01         | 5.54           | 58.03             | 63.2            | -0.67                           |
| HabZIP36    | 390                  | 41613.95         | 9.69           | 37.39             | 60.72           | -0.628                          |
| HabZIP27    | 164                  | 18405.75         | 9.37           | 61.16             | 60.73           | -0.905                          |
| HabZIP56    | 160                  | 17835.94         | 9.55           | 61.44             | 69.5            | -1.054                          |
| HabZIP19    | 131                  | 14692.96         | 10.25          | 45.4              | 84.12           | -0.749                          |
| HabZIP67    | 444                  | 47959.69         | 9.13           | 53.02             | 63.74           | -0.713                          |
| HabZIP24    | 140                  | 15853.14         | 9.45           | 43.02             | 86.21           | -0.736                          |
| HabZIP13    | 222                  | 25006.32         | 9.37           | 59.62             | 67.25           | -0.815                          |
| HabZIP80    | 267                  | 29294.3          | 5.94           | 62.93             | 46.44           | -1.013                          |
| HabZIP39    | 382                  | 41733.82         | 9.26           | 51.95             | 60              | -0.73                           |
| HabZIP2     | 148                  | 16695.84         | 6.12           | 47.86             | 85.07           | -0.665                          |
| HabZIP54    | 348                  | 36527            | 9.34           | 46.88             | 66.49           | -0.678                          |
| HabZIP79    | 313                  | 34245.63         | 5.11           | 54.36             | 59.81           | -0.78                           |
| HabZIP3     | 183                  | 21508.85         | 5.62           | 43.91             | 66.07           | -0.972                          |
| HabZIP75    | 166                  | 18610.85         | 6.3            | 52.28             | 64.04           | -0.599                          |
| HabZIP61    | 277                  | 30856.11         | 5.34           | 63.94             | 62.38           | -0.829                          |
| HabZIP60    | 110                  | 11941.69         | 10.88          | 46.36             | 78.73           | -0.442                          |
| HabZIP68    | 347                  | 37421.08         | 5.1            | 63.41             | 47.03           | -0.948                          |
| HabZIP34    | 280                  | 31957.38         | 5.63           | 57.47             | 61.68           | -0.946                          |
| HabZIP53    | 147                  | 16650.02         | 8.82           | 55.67             | 84.97           | -0.614                          |
| HabZIP73    | 349                  | 37239.83         | 5.59           | 56.79             | 40.66           | -0.971                          |
| HabZIP7     | 138                  | 16296.6          | 9.14           | 69.54             | 57.9            | -0.962                          |
| HabZIP31    | 450                  | 49250.36         | 7.2            | 48                | 78.42           | -0.503                          |
| HabZIP63    | 443                  | 48288.68         | 6.05           | 57.48             | 56.34           | -0.832                          |
| HabZIP42    | 172                  | 20102.31         | 5.96           | 60.08             | 70.76           | -0.868                          |
| HabZIP72    | 325                  | 35249.71         | 5.72           | 55.51             | 42.34           | -1.007                          |
| HabZIP76    | 269                  | 30209.34         | 5.64           | 69.36             | 64.91           | -0.861                          |

|          |     |          |       |       |       |        |
|----------|-----|----------|-------|-------|-------|--------|
| HabZIP11 | 175 | 20137.85 | 8.55  | 65.85 | 76.34 | -0.605 |
| HabZIP78 | 351 | 37376.84 | 5.87  | 57.98 | 38.43 | -1.026 |
| HabZIP9  | 353 | 39179.27 | 5.43  | 52.04 | 64.08 | -0.666 |
| HabZIP41 | 382 | 40875.69 | 5.98  | 59.2  | 43.51 | -1.047 |
| HabZIP64 | 159 | 17573.61 | 9.73  | 54.2  | 65.09 | -1.066 |
| HabZIP62 | 379 | 40738.31 | 6.48  | 57.16 | 53.64 | -0.88  |
| HabZIP43 | 193 | 22289.78 | 5.35  | 64.37 | 73.78 | -0.78  |
| HabZIP35 | 489 | 54328.64 | 9.5   | 45.7  | 79.75 | -0.548 |
| HabZIP29 | 413 | 45741.9  | 6.78  | 44.86 | 74.62 | -0.67  |
| HabZIP16 | 374 | 40299.22 | 5.64  | 65.25 | 47.78 | -1.017 |
| HabZIP46 | 508 | 56579.34 | 6.34  | 62.6  | 74.39 | -0.627 |
| HabZIP55 | 375 | 40188.65 | 6.74  | 55.27 | 56.83 | -0.85  |
| HabZIP58 | 210 | 24464.09 | 5.71  | 57.47 | 66.9  | -0.894 |
| HabZIP81 | 131 | 15095.16 | 6.91  | 57.89 | 80.31 | -0.544 |
| HabZIP8  | 164 | 19107.39 | 6.38  | 52.57 | 77.8  | -0.765 |
| HabZIP30 | 584 | 63658.61 | 7     | 59.17 | 54.18 | -0.977 |
| HabZIP52 | 296 | 32825.7  | 6.73  | 53.19 | 62.33 | -0.765 |
| HabZIP48 | 211 | 24592.26 | 5.75  | 60.38 | 59.62 | -1.001 |
| HabZIP74 | 325 | 36123.23 | 8.03  | 43.94 | 61.63 | -0.786 |
| HabZIP5  | 149 | 17372.86 | 10.09 | 59.82 | 90.2  | -0.68  |
| HabZIP70 | 169 | 19766.98 | 5.76  | 59.23 | 81.42 | -0.851 |
| HabZIP77 | 132 | 15033.52 | 5.67  | 72.2  | 57.65 | -1.195 |
| HabZIP6  | 152 | 17598.65 | 6.42  | 50.61 | 64.21 | -0.971 |
| HabZIP10 | 315 | 34663.08 | 5.75  | 48.36 | 59.78 | -0.85  |
| HabZIP21 | 512 | 56907.53 | 6.53  | 56.58 | 73.55 | -0.578 |
| HabZIP51 | 349 | 38470.02 | 6.61  | 48.27 | 65.21 | -0.798 |
| HabZIP26 | 328 | 36462.02 | 8.63  | 61.5  | 81.62 | -0.53  |
| HabZIP20 | 328 | 36392.94 | 7.9   | 59.46 | 83.38 | -0.492 |
| HabZIP71 | 340 | 37677.35 | 5.97  | 61.72 | 61.24 | -0.908 |
| HabZIP1  | 183 | 21331.21 | 10.14 | 65.71 | 71.91 | -0.868 |
| HabZIP25 | 167 | 19318.14 | 9.68  | 41.04 | 74.73 | -0.712 |
| HabZIP45 | 326 | 36480.08 | 8.63  | 60.54 | 81.23 | -0.538 |
| HabZIP69 | 424 | 46585.69 | 6.28  | 60.28 | 60.12 | -0.847 |
| HabZIP33 | 333 | 36436.1  | 5.84  | 50.5  | 69.79 | -0.759 |
| HabZIP4  | 175 | 19245.39 | 6.28  | 57.57 | 72.97 | -0.507 |
| HabZIP65 | 499 | 56214.97 | 6.75  | 60.01 | 73.51 | -0.617 |
| HabZIP32 | 338 | 37172.54 | 5.75  | 63.38 | 55.27 | -0.894 |
| HabZIP59 | 335 | 38627.19 | 6.21  | 57.77 | 64.63 | -0.91  |
| HabZIP44 | 178 | 20524.3  | 6.14  | 56.25 | 72.3  | -0.357 |
| HabZIP18 | 335 | 37343.03 | 5.96  | 50.39 | 62.45 | -0.888 |

Table S2    Summary of clean reads in the axillary bud transcriptomes of Sunflower.

| Sample name | Raw<br>reads | Clean<br>reads | UMI<br>reads | Raw<br>bases | Clean<br>bases | Error<br>rate(%) | Q20(%) | Q30(%) | GC<br>content(%) | UMI2Clean<br>(%) | Dedup2Mapped<br>UMI(%) | Deduped<br>ratio(%) |
|-------------|--------------|----------------|--------------|--------------|----------------|------------------|--------|--------|------------------|------------------|------------------------|---------------------|
| Dec 0 d 1   | 43445922     | 42830278       | 41707362     | 6.52G        | 6.42G          | 0.03             | 97.04  | 92.03  | 45.44            | 97.38            | 75.75                  | 24.25               |
| Dec 0 d 2   | 50078208     | 49272174       | 47934822     | 7.51G        | 7.39G          | 0.03             | 97.39  | 92.7   | 45.71            | 97.29            | 76.88                  | 23.12               |
| Dec 0 d 3   | 45716982     | 45123796       | 44077852     | 6.86G        | 6.77G          | 0.03             | 97.76  | 93.35  | 45.03            | 97.68            | 69.7                   | 30.3                |
| Dec 1 d 1   | 43840122     | 43243934       | 42171020     | 6.58G        | 6.49G          | 0.03             | 97.28  | 92.59  | 45.21            | 97.52            | 75.18                  | 24.82               |
| Dec 1 d 2   | 47869830     | 47267758       | 46168586     | 7.18G        | 7.09G          | 0.03             | 97.77  | 93.37  | 45.12            | 97.67            | 69.78                  | 30.22               |
| Dec 1 d 3   | 44088116     | 43556448       | 42528244     | 6.61G        | 6.53G          | 0.03             | 97.09  | 92.11  | 44.74            | 97.64            | 76.82                  | 23.18               |
| Dec 2 d 1   | 45769928     | 45159426       | 43931236     | 6.87G        | 6.77G          | 0.03             | 97.15  | 92.29  | 45.17            | 97.28            | 74.54                  | 25.46               |
| Dec 2 d 2   | 42009198     | 41468536       | 40389784     | 6.3G         | 6.22G          | 0.03             | 96.9   | 91.74  | 44.74            | 97.4             | 72.31                  | 27.69               |
| Dec 2 d 3   | 43012750     | 42227792       | 41178168     | 6.45G        | 6.33G          | 0.03             | 97.15  | 92.33  | 44.81            | 97.51            | 74.77                  | 25.23               |
